# Supplementary material
Source: Springer Nature journal article supplement (https://www.springermedizin.de/resource/supplementary/13000_2009_246_MOESM3_ESM.pdf/9624168)

**A**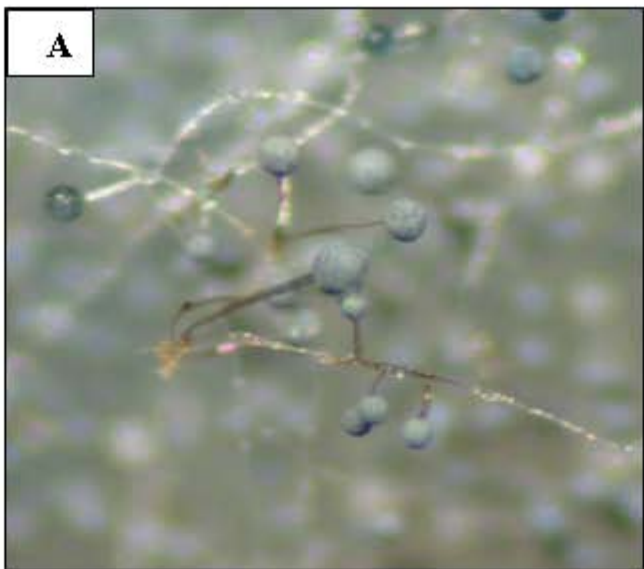**B**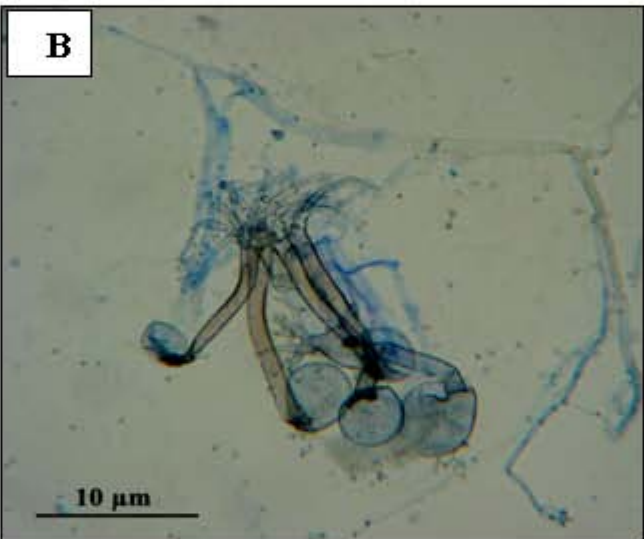**3C**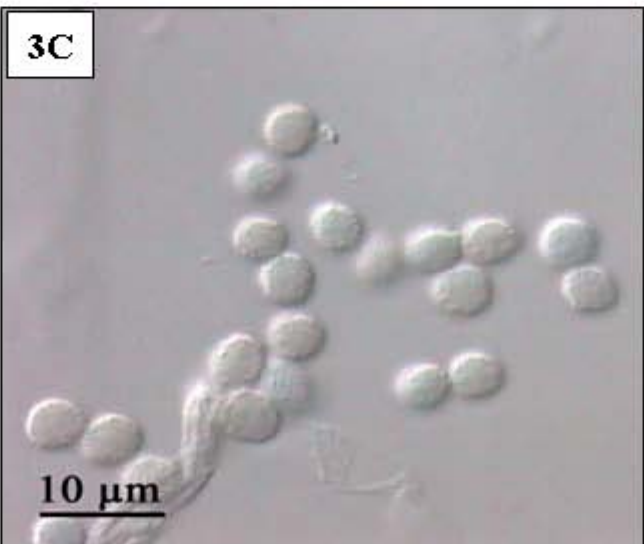

Supplement: MOESM3 [file 9624168]
